# Supplementary material for: Mechanical polishing with chemical passivation of perovskite single crystals for high-performance X-ray detectors
Source: Royal Society of Chemistry journal article supplement (doi:10.1039/d2tc03850a), 2022-01-01
Supplement: d2tc03850a1.pdf [file d2tc03850a1.pdf]

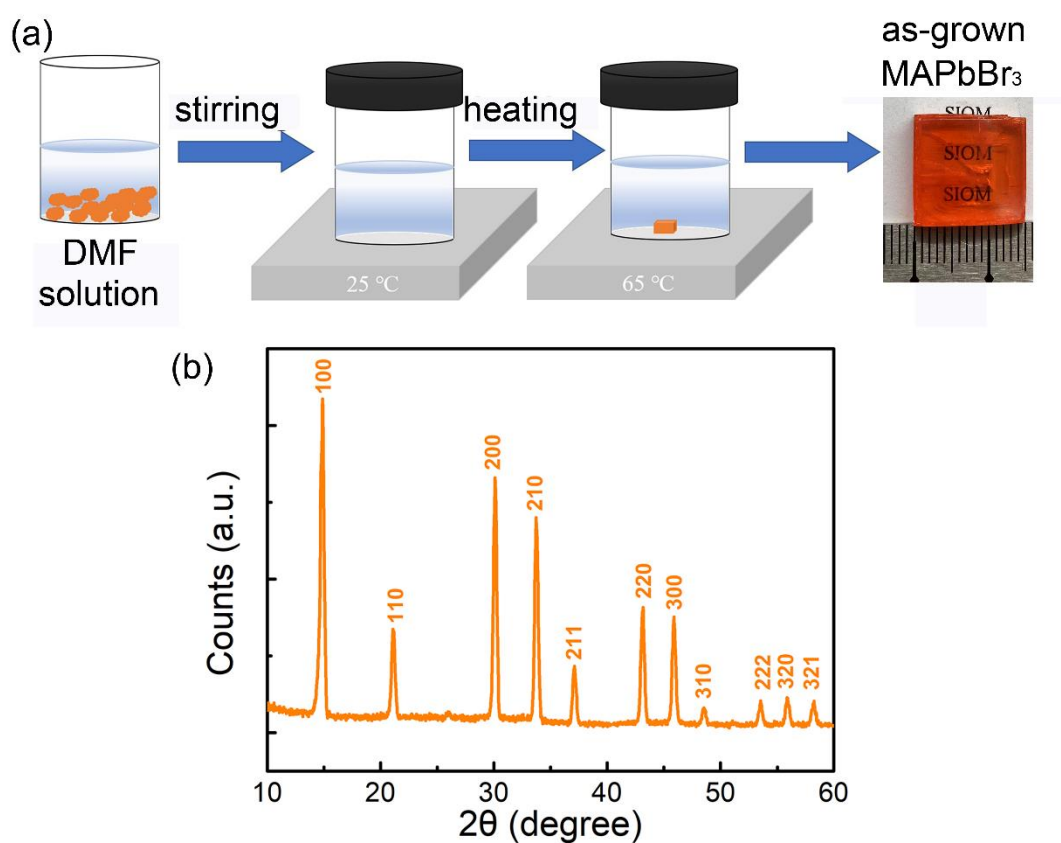

**Figure S1.** (a) Schematic representation of crystals growth process based on inversion temperature crystallization (ITC). (b) Powder X-ray diffraction of as-grown MAPbBr<sub>3</sub> crystals.

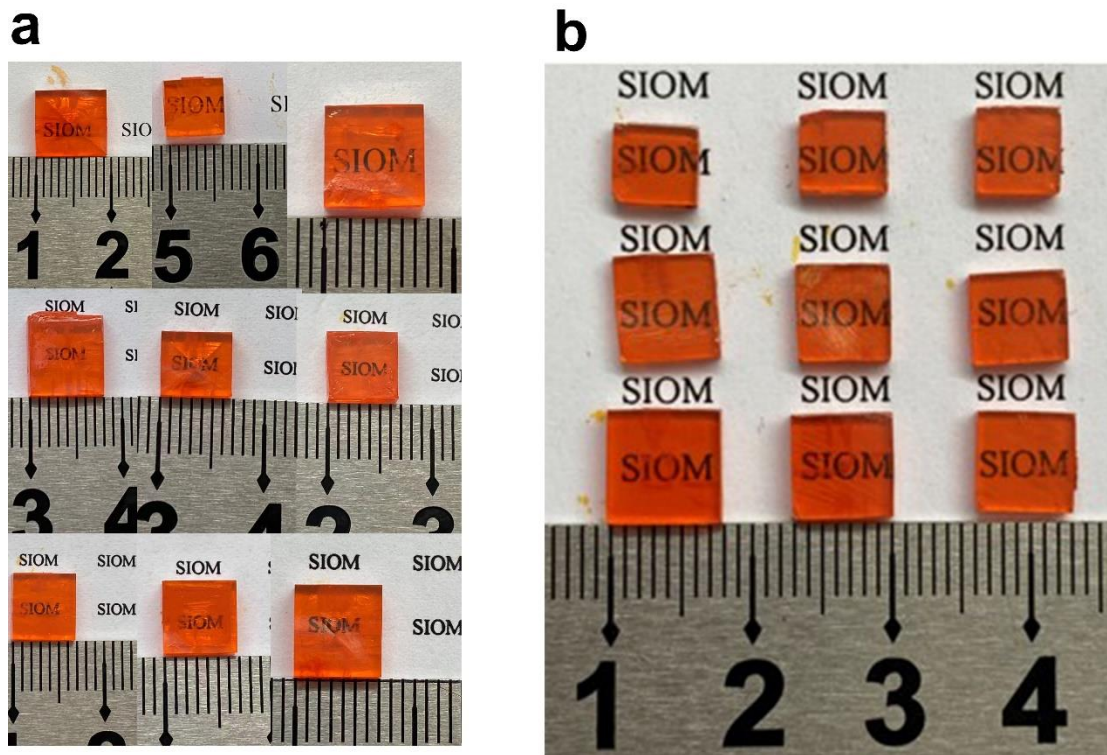

**Figure S2.** The photographs of (a) as-grown and (b) polished MAPbBr<sub>3</sub> crystals.

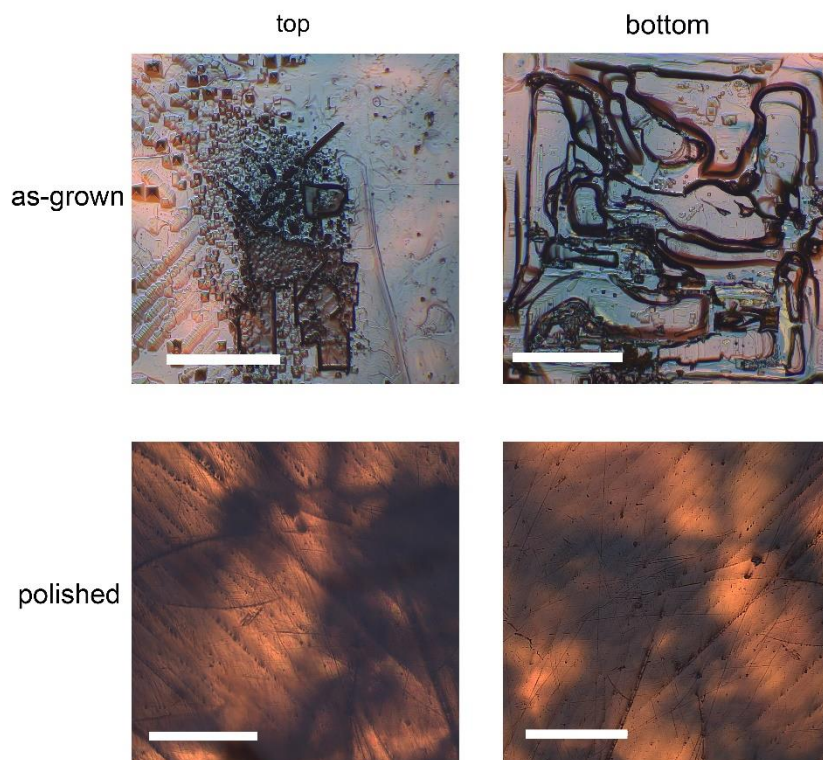

**Figure S3.** Optical micrographs of top and bottom surface of as-grown and polished MAPbBr<sub>3</sub> crystal. The scale bars represent 500  $\mu\text{m}$ .

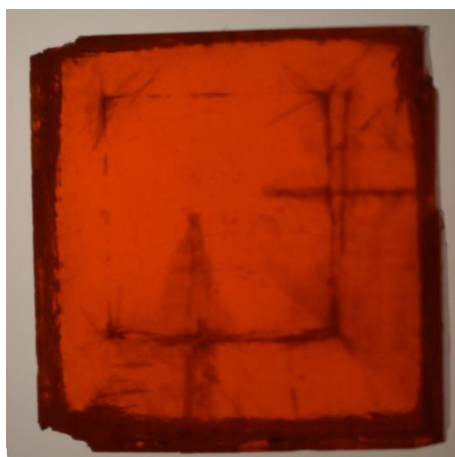

**Figure S4.** The photograph of the polished crystal. The edge of the inner seed crystal shows a black outline in the figure.

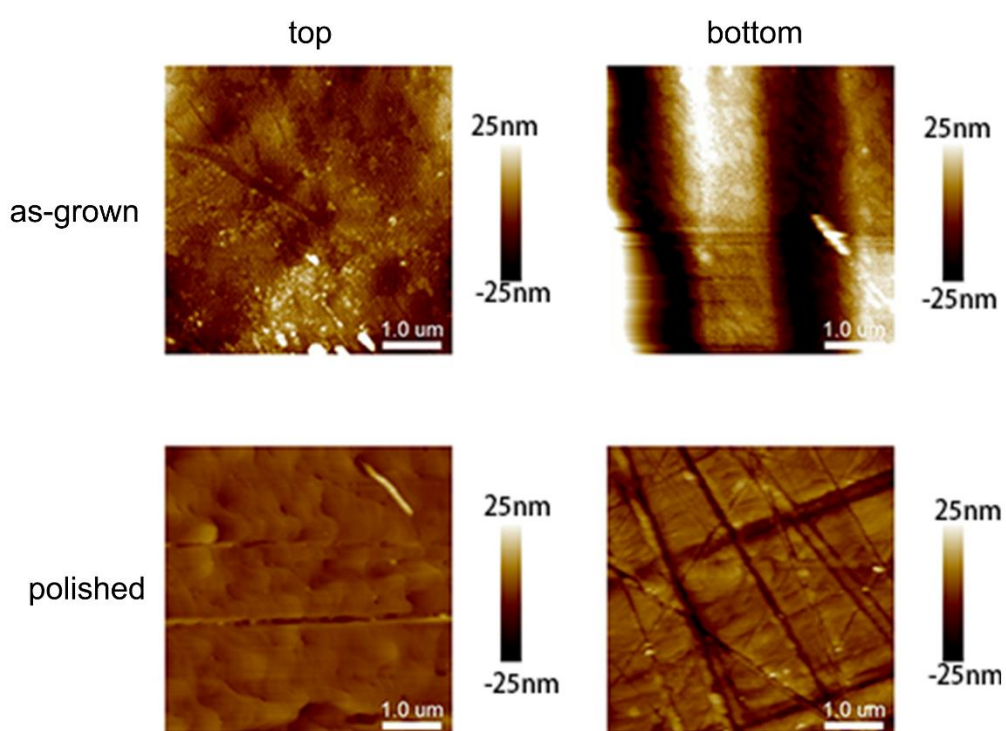

**Figure S5.** Atomic force microscopy (AFM) images of top and bottom surface of as-grown and polished MAPbBr<sub>3</sub> crystal. The scale bars represent and 1 μm.

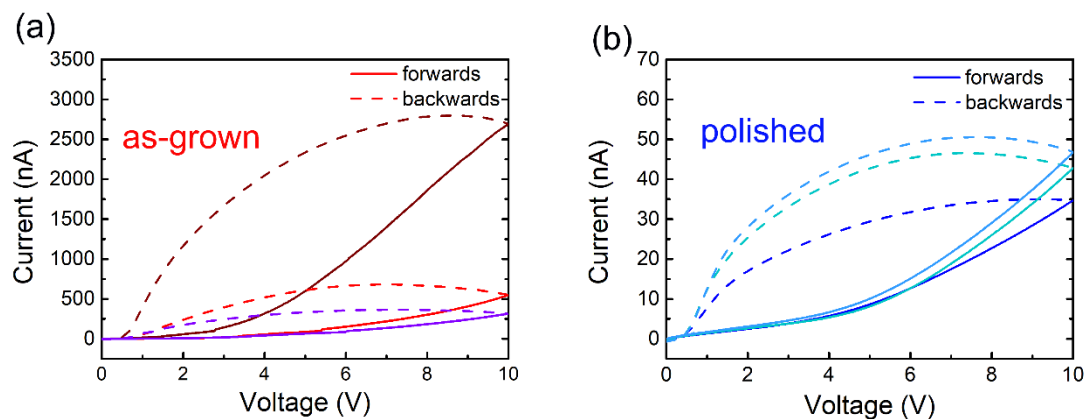

**Figure S6.** Current - voltage sweep curves of (a) three as-grown and (b) three polished MAPbBr<sub>3</sub> crystals.

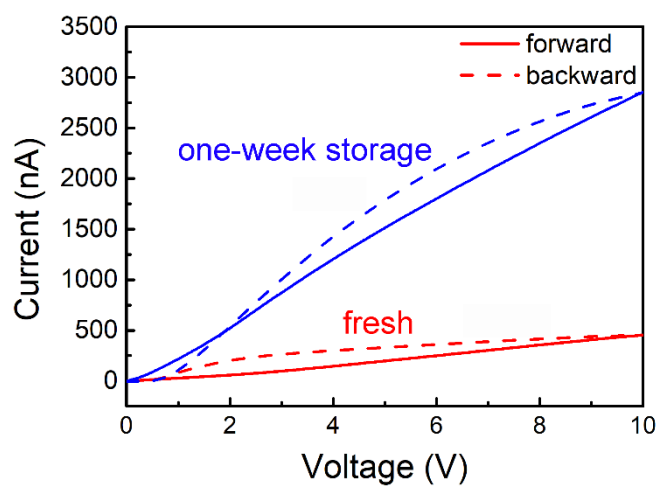

**Figure S7.** Current - voltage sweep curves of fresh and one-week storage planar device based on as-grown MAPbBr<sub>3</sub> crystals.

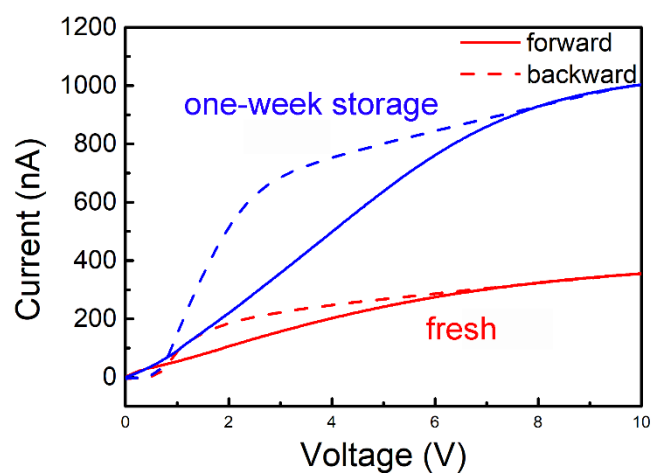

**Figure S8.** Current - voltage sweep curves of fresh and one-week storage planar device based on MAPbBr<sub>3</sub> crystal polished without passivant.

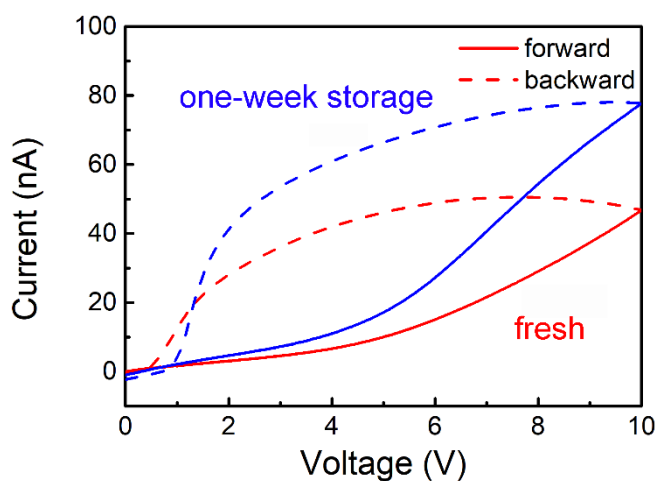

**Figure S9.** Current - voltage sweep curves of fresh and one-week storage planar device based on MAPbBr<sub>3</sub> crystal polished with passivant.

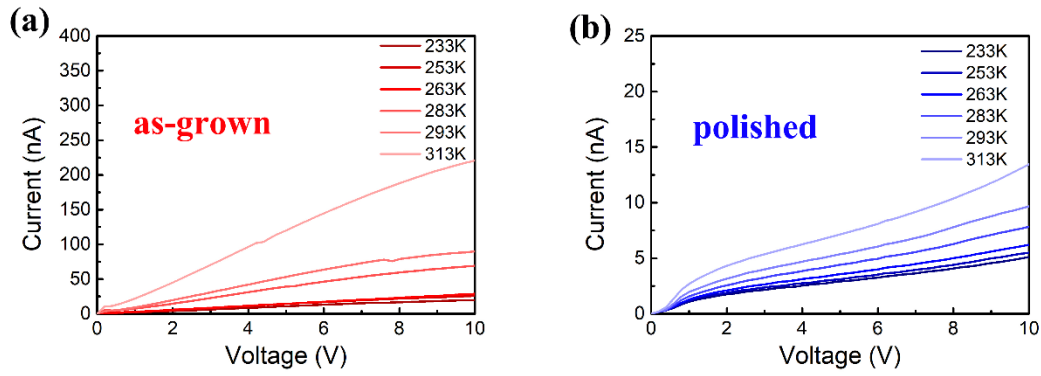

**Figure S10.** Current - voltage sweep curves of planar device based on (a) as-grown and (b) polished MAPbBr<sub>3</sub> crystals at different temperature.

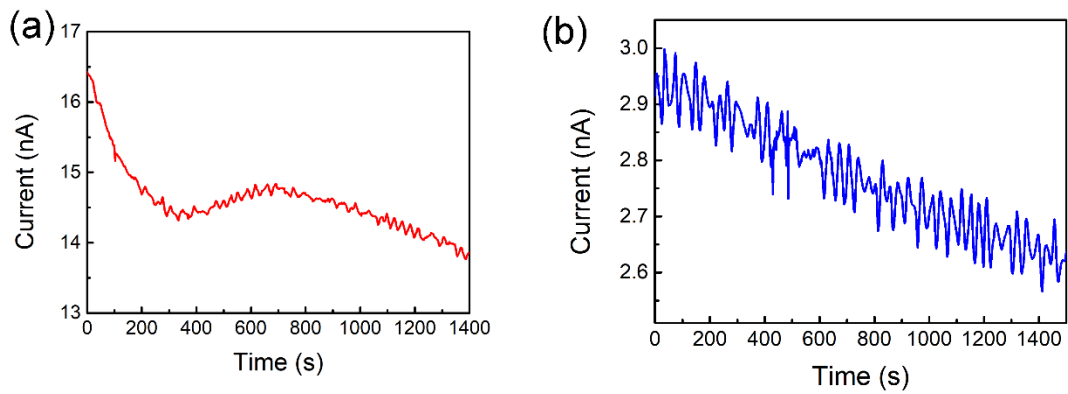

**Figure S11.** The dark current of the sandwich devices based on the (a) as-grown and (b) polished crystals from 0 to 1400s.

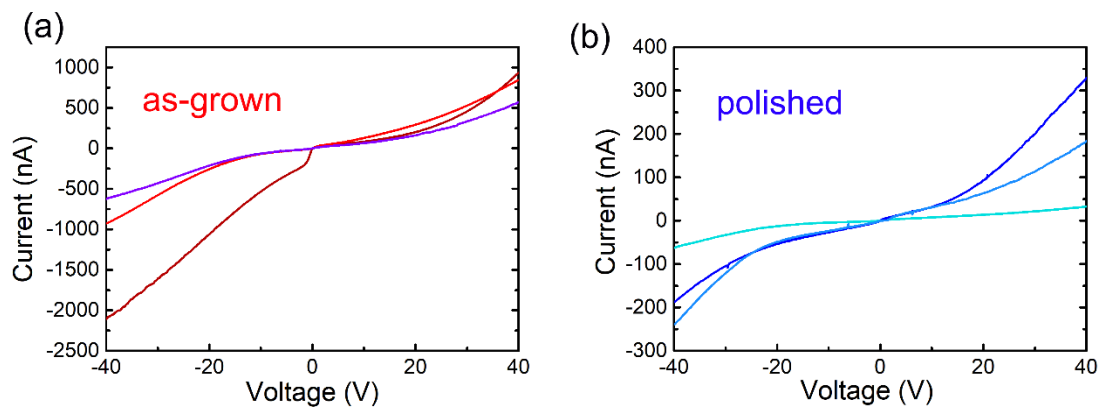

**Figure S12.** IV sweep curves of three sandwich structure devices based on (a) as-grown MAPbBr<sub>3</sub> and (b) MAPbBr<sub>3</sub> polished by passivant.

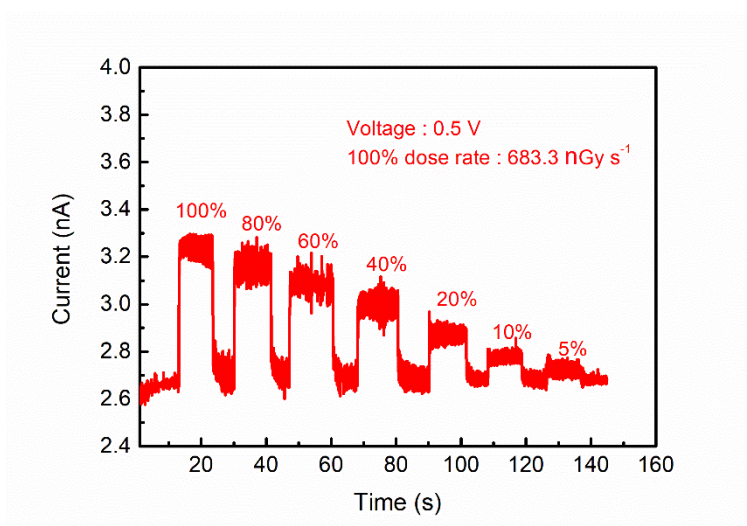

**Figure S13.** X-ray responses at different dose rates of X-ray detector based on polished MAPbBr<sub>3</sub> under 0.5V bias. The maximal dose rate used here is about 683.3 nGy s<sup>-1</sup>.

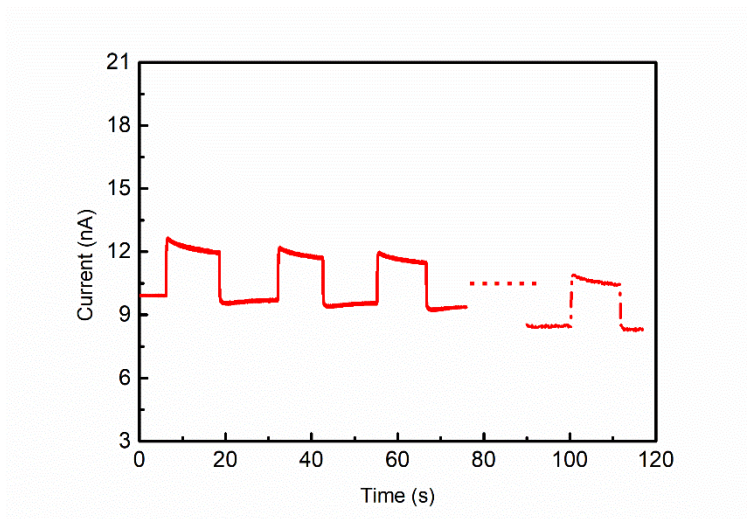

**Figure S14.** Time dependent response of X-ray detector based on as-grown MAPbBr<sub>3</sub> crystal at 0.6833  $\mu\text{Gy s}^{-1}$  dose rate under 0.2V. The dashed line pulse occurs after the solid line pulse train. The time corresponding to the dashed pulse in the figure has no practical significance. The figure relates to the figure 5 in the text.

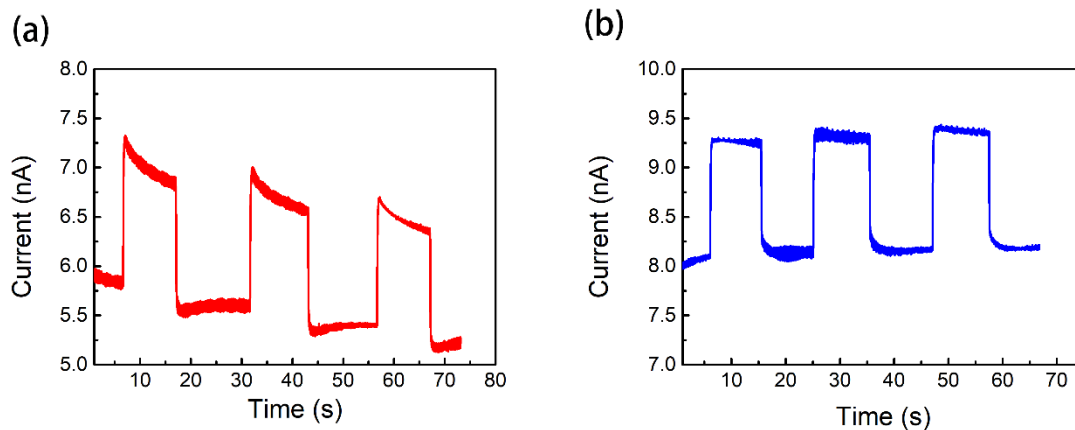

**Figure S15.** The stability of the devices based on the (a) as-grown and (b) polished crystals under the same radiation response.

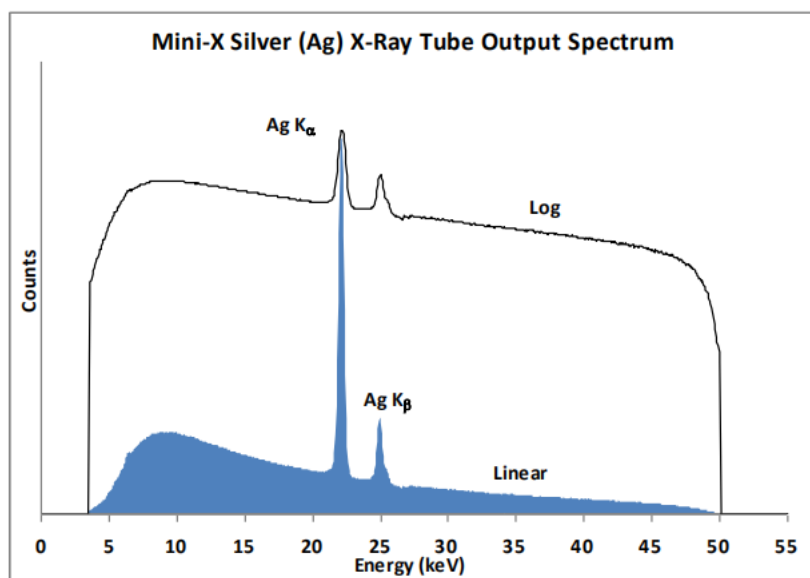

**Figure S16.** Output Spectrum with silver (Ag) target. This was measured using a 1 mm thick CdTe detector located 1 meter from the Mini-X with a 1 mm pinhole collimator in front of the detector. Reproduced with permission from <https://www.amptek.com/products/mini-x2-x-ray-tube>. Copyright 2019 AMPTEK, Inc.



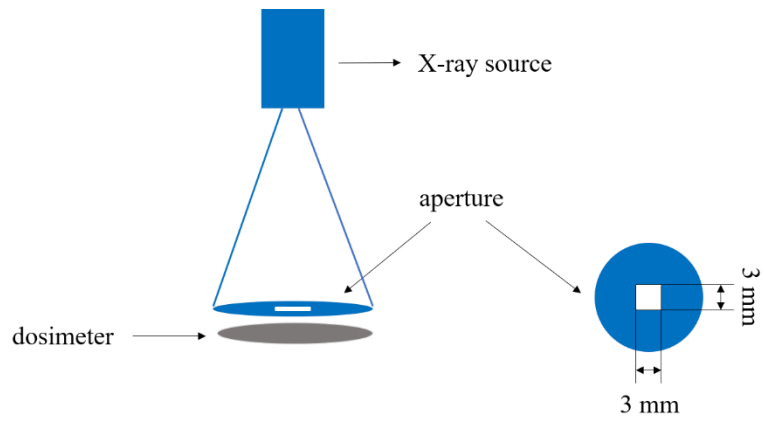

**Figure S17.** The schematic diagram of the measurement process.

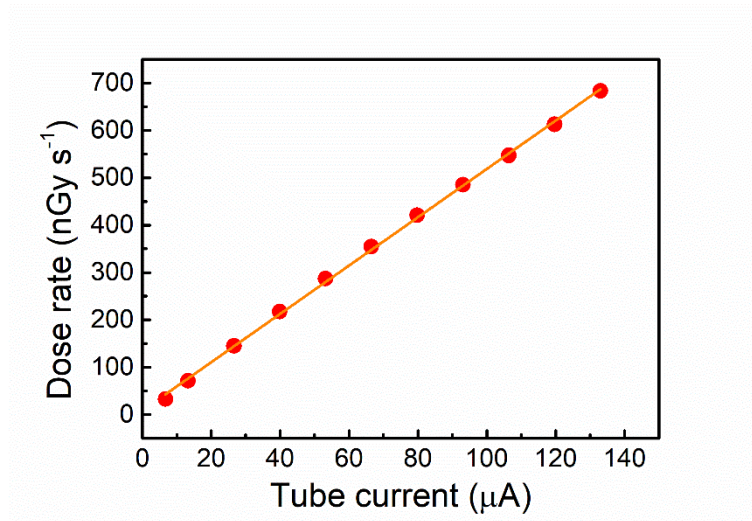

**Figure S18.** The relationship between dose rate and tube current.

**Table 1.** Summary of Performance for X-ray Detectors Based on Perovskite.

| device structure                                                      | sensitivity ( $\mu\text{C Gy}^{-1} \text{cm}^{-2}$ ) | detection limit ( $\text{nGy s}^{-1}$ ) | X-ray (keV) | bias (V/mm) | ref       |
|-----------------------------------------------------------------------|------------------------------------------------------|-----------------------------------------|-------------|-------------|-----------|
| Au/MAPbBr <sub>3</sub> /C <sub>60</sub> /BCP/Au                       | 80                                                   | 500                                     | 50          | /           | 1         |
| Au/MAPbBr <sub>3</sub> /Au                                            | 39.1                                                 | /                                       | 50          | 0.5         | 2         |
| Al/MAPbBr <sub>3</sub> /Au                                            | 359                                                  | /                                       | 50          | 14,300      | 3         |
| ITO/PEDOT: PSS/MAPbBr <sub>3</sub> /C <sub>60</sub> /BCP/ Cu          | 632                                                  | /                                       | 50          | ~ 5         | 4         |
| Au/poly-TPD/MAPbBr <sub>3</sub> /C <sub>60</sub> /PCBM/Ag             | 23,600                                               | /                                       | 30          | 50          | 5         |
| Au/BCP/C <sub>60</sub> /MAPbBr <sub>3</sub> /Si                       | 21,000                                               | 36                                      | 8           | ~3.5        | 6         |
| Cr/BCP/C <sub>60</sub> /MAPbBr <sub>2.94</sub> Cl <sub>0.06</sub> /Cr | 84,000                                               | 7.6                                     | 8           | 60          | 7         |
| Au/MAPbBr <sub>2.5</sub> Cl <sub>0.5</sub> ( <i>p-i-n</i> )/Au        | 36,000                                               | 16                                      | 40          | 50          | 8         |
| FTO/CsPbBr <sub>3</sub> /Au                                           | 55,684                                               | 215                                     | 30          | 5           | 9         |
| Au/Cs <sub>2</sub> AgBiBr <sub>6</sub> /Au                            | /                                                    | 59.7                                    | 30          | 2.5         | 10        |
| Au/(NH <sub>4</sub> ) <sub>3</sub> Bi <sub>2</sub> I <sub>9</sub> /Ag | 803                                                  | < 55                                    | 50          | 6.5         | 11        |
| Cr/PEA <sub>2</sub> PbBr <sub>4</sub> /Au                             | 806                                                  | 42                                      | 150         | 500         | 12        |
| Au/MAPbBr <sub>3</sub> /Au                                            | 21,897.44                                            | 25                                      | 30          | 0.5         | this work |

## References

1. H. Wei, Y. Fang, P. Mulligan, W. Chuirazzi, H.-H. Fang, C. Wang, B. R. Ecker, Y. Gao, M. A. Loi, L. Cao and J. Huang, *Nat. Photonics*, 2016, **10**, 333-339.
2. W. P. Haodi Wu, Nian Liu, Xinyuan Du, Guangda Niu, Jiang Tang, *IEEE Nucl. Sci. Sympos. Med. Imag. Confer.*, 2019.
3. Q. Xu, W. Shao, Y. Li, X. Zhang, X. Ouyang, J. Liu, B. Liu, Z. Wu, X. Ouyang, X. Tang and W. Jia, *ACS Appl. Mater. Interfaces*, 2019, **11**, 9679-9684.
4. A. Feng, S. Xie, X. Fu, Z. Chen and W. Zhu, *Front. Chem.*, 2021, **9**, 823868.

5. X. Wang, D. Zhao, Y. Qiu, Y. Huang, Y. Wu, G. Li, Q. Huang, Q. Khan, A. Nathan, W. Lei and J. Chen, *Phys. Status Solidi - R.*, 2018, **12**.
6. W. Wei, Y. Zhang, Q. Xu, H. Wei, Y. Fang, Q. Wang, Y. Deng, T. Li, A. Gruverman, L. Cao and J. Huang, *Nat. Photonics*, 2017, **11**, 315-321.
7. H. Wei, D. DeSantis, W. Wei, Y. Deng, D. Guo, T. J. Savenije, L. Cao and J. Huang, *Nat. Mater.*, 2017, **16**, 826-833.
8. X. Wang, Y. Xu, Y. Pan, Y. Li, J. Xu, J. Chen, J. Wu, Q. Li, X. Zhang, Z. Zhao, C. Li, E. E. Elemike, D. C. Onwudiwe, J. Akram and W. Lei, *Nano Energy*, 2021, **89**.
9. W. Pan, B. Yang, G. Niu, K. H. Xue, X. Du, L. Yin, M. Zhang, H. Wu, X. S. Miao and J. Tang, *Adv. Mater.*, 2019, **31**, e1904405.
10. W. Pan, H. Wu, J. Luo, Z. Deng, C. Ge, C. Chen, X. Jiang, W.-J. Yin, G. Niu, L. Zhu, L. Yin, Y. Zhou, Q. Xie, X. Ke, M. Sui and J. Tang, *Nat. Photonics*, 2017, **11**, 726-732.
11. R. Zhuang, X. Wang, W. Ma, Y. Wu, X. Chen, L. Tang, H. Zhu, J. Liu, L. Wu, W. Zhou, X. Liu and Y. Yang, *Nat. Photonics*, 2019, **13**, 602-608.
12. F. Lédée, A. Ciavatti, M. Verdi, L. Basiricò and B. Fraboni, *Adv. Opt. Mater.*, 2021, **10**.
